# Supplementary material for: Mutation and Microsatellite Instability (MSI) Affect the Differential Gene Expression of Folic Acid and 5-Flourouracil Metabolism-Related Genes in Colorectal Carcinoma
Source: MDPI journal article supplement (doi:10.3390/curroncol32120661), 2025-11-26
Supplement: s1 [file Supplementary Figure S1.pdf › Supplementary Figure S1.pdf]

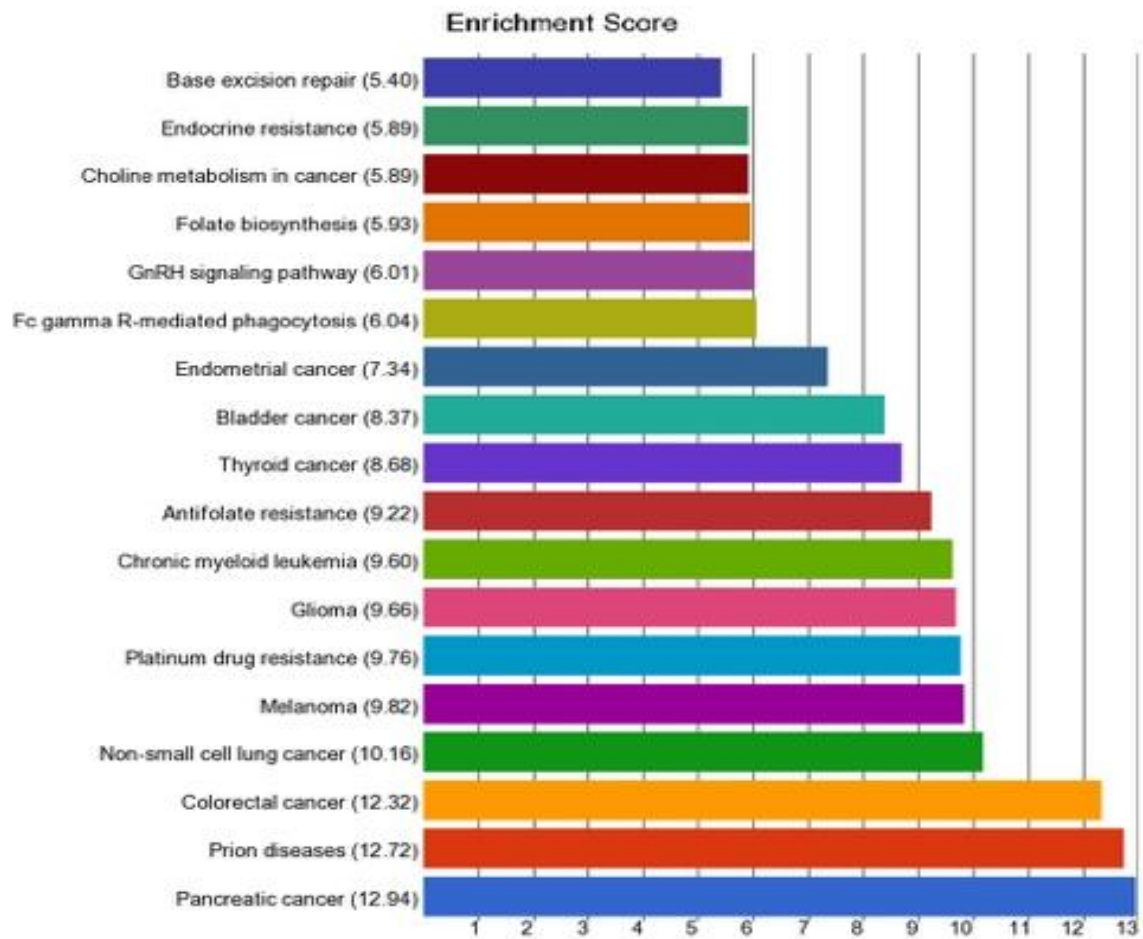

**Supplementary Figure S1.** Gene set enrichment analysis of the pathways that involve 29 folic acid related genes that were significantly influenced by age of onset.
