# Supplementary material for: Mutation and Microsatellite Instability (MSI) Affect the Differential Gene Expression of Folic Acid and 5-Flourouracil Metabolism-Related Genes in Colorectal Carcinoma
Source: MDPI journal article supplement (doi:10.3390/curroncol32120661), 2025-11-26
Supplement: s1 [file Supplementary Table S3.pdf › Supplementary Table S3.pdf]

**Table S3.** Significant Paired Analysis Results (FC at least 1.2 in either direction at FDR 0.05) from 380 Probes Covering 180 Genes.

| Probe set ID | Name of gene | Fold-Change | (95% CI)      | p-value                | FDR p-value            |
|--------------|--------------|-------------|---------------|------------------------|------------------------|
| ILMN_1673711 | HSP90AB1     | 1.78087     | 1.66 - 1.91   | 1.26×10 <sup>-24</sup> | 3.68×10 <sup>-22</sup> |
| ILMN_1800317 | WNT5A        | 2.50354     | 2.23 - 2.81   | 2.24E-24               | 3.68E-22               |
| ILMN_1723971 | SLC29A1      | 1.97914     | 1.80 - 2.17   | 1.96E-22               | 2.10E-20               |
| ILMN_1765966 | CHGB         | -3.27852    | -3.85 - -2.79 | 2.56E-22               | 2.10E-20               |
| ILMN_1689001 | CDK4         | 1.7849      | 1.65 - 1.93   | 3.60E-22               | 2.36E-20               |
| ILMN_2338963 | SLC29A1      | 1.7246      | 1.60 - 1.86   | 1.50E-21               | 8.21E-20               |
| ILMN_2246956 | BCL2         | -1.8574     | -2.04 - -1.69 | 2.26E-20               | 1.06E-18               |
| ILMN_1803180 | PRDX6        | -1.85444    | -2.05 - -1.68 | 6.50E-19               | 2.67E-17               |
| ILMN_1801119 | BCL2         | -1.71613    | -1.87 - -1.57 | 1.71E-18               | 6.25E-17               |
| ILMN_1686367 | HSPA8        | 1.43925     | 1.35 - 1.53   | 8.32E-18               | 2.73E-16               |
| ILMN_1720373 | SLC7A5       | 2.68475     | 2.26 - 3.19   | 2.69E-17               | 8.03E-16               |
| ILMN_2366388 | PRDX1        | 1.50809     | 1.40 - 1.62   | 4.02E-17               | 1.10E-15               |
| ILMN_2393573 | RASSF1       | 1.292       | 1.23 - 1.35   | 1.14E-16               | 2.87E-15               |
| ILMN_1734205 | RASSF1       | 1.34999     | 1.28 - 1.43   | 3.16E-16               | 7.40E-15               |
| ILMN_1788166 | TTK          | 1.54609     | 1.43 - 1.68   | 4.47E-16               | 9.77E-15               |
| ILMN_2366391 | PRDX1        | 1.51496     | 1.40 - 1.64   | 4.86E-16               | 9.96E-15               |
| ILMN_1802404 | ABCC1        | 1.32038     | 1.25 - 1.39   | 6.67E-16               | 1.29E-14               |
| ILMN_1688480 | CCND1        | 1.94754     | 1.72 - 2.21   | 1.01E-15               | 1.83E-14               |
| ILMN_1725260 | CDC25C       | 1.36668     | 1.29 - 1.45   | 1.06E-15               | 1.83E-14               |
| ILMN_1808132 | FAS          | -1.27807    | -1.34 - -1.22 | 1.74E-15               | 2.85E-14               |
| ILMN_2202948 | BUB1         | 1.66048     | 1.51 - 1.83   | 2.17E-15               | 3.39E-14               |
| ILMN_2373763 | CASP7        | -1.66858    | -1.84 - -1.51 | 2.54E-15               | 3.78E-14               |
| ILMN_1680955 | AURKA        | 1.79636     | 1.60 - 2.01   | 4.26E-15               | 6.07E-14               |
| ILMN_1747911 | CDC2         | 1.83001     | 1.62 - 2.06   | 5.68E-15               | 7.76E-14               |
| ILMN_2349459 | BIRC5        | 1.69672     | 1.53 - 1.88   | 7.18E-15               | 9.42E-14               |

|              |          |          |               |          |          |
|--------------|----------|----------|---------------|----------|----------|
| ILMN_1801307 | TNFSF10  | -1.69826 | -1.89 - -1.53 | 7.89E-15 | 9.95E-14 |
| ILMN_1664630 | CHEK1    | 1.64626  | 1.49 - 1.82   | 8.79E-15 | 1.07E-13 |
| ILMN_1660436 | HSPA1B   | 1.89159  | 1.66 - 2.15   | 1.17E-14 | 1.38E-13 |
| ILMN_2319077 | FAS      | -1.50069 | -1.63 - -1.38 | 1.27E-14 | 1.44E-13 |
| ILMN_2357438 | AURKA    | 1.81687  | 1.61 - 2.05   | 1.58E-14 | 1.72E-13 |
| ILMN_1672496 | DNAJA1   | 1.45756  | 1.35 - 1.57   | 2.80E-14 | 2.97E-13 |
| ILMN_1775304 | DNAJB1   | 1.52127  | 1.39 - 1.66   | 4.67E-14 | 4.78E-13 |
| ILMN_2413084 | HSPA8    | 1.43912  | 1.33 - 1.55   | 8.79E-14 | 8.74E-13 |
| ILMN_1710428 | CDC2     | 1.38367  | 1.29 - 1.48   | 1.70E-13 | 1.64E-12 |
| ILMN_2336781 | SOD2     | 2.05878  | 1.76 - 2.41   | 1.93E-13 | 1.80E-12 |
| ILMN_1667260 | MAPK3    | -1.69561 | -1.90 - -1.51 | 2.22E-13 | 2.02E-12 |
| ILMN_2402341 | MAPK3    | -1.662   | -1.86 - -1.49 | 2.54E-13 | 2.25E-12 |
| ILMN_1768662 | UCK2     | 1.31399  | 1.24 - 1.39   | 2.64E-13 | 2.28E-12 |
| ILMN_2374159 | HERPUD1  | -1.55379 | -1.71 - -1.41 | 4.50E-13 | 3.78E-12 |
| ILMN_1654118 | BCL2L1   | 1.52815  | 1.39 - 1.68   | 5.03E-13 | 4.12E-12 |
| ILMN_2373515 | HSP90AA1 | 1.34465  | 1.26 - 1.44   | 5.41E-13 | 4.33E-12 |
| ILMN_1777564 | MAD2L1   | 1.78874  | 1.56 - 2.05   | 5.11E-12 | 3.96E-11 |
| ILMN_2406501 | SOD2     | 1.75456  | 1.54 - 2.00   | 5.19E-12 | 3.96E-11 |
| ILMN_1710756 | ENO1     | 1.39373  | 1.29 - 1.51   | 5.96E-12 | 4.44E-11 |
| ILMN_1667213 | DFFA     | 1.21417  | 1.16 - 1.27   | 8.07E-12 | 5.88E-11 |
| ILMN_2407619 | CDC25C   | 1.31453  | 1.23 - 1.40   | 1.08E-11 | 7.67E-11 |
| ILMN_1803124 | BIRC5    | 1.229    | 1.17 - 1.29   | 1.41E-11 | 9.82E-11 |
| ILMN_1691097 | HSP90AA1 | 1.59179  | 1.42 - 1.79   | 2.67E-11 | 1.82E-10 |
| ILMN_1729051 | MSH6     | 1.39517  | 1.28 - 1.52   | 3.12E-11 | 2.09E-10 |
| ILMN_2374164 | HERPUD1  | -1.5329  | -1.71 - -1.38 | 3.56E-11 | 2.34E-10 |
| ILMN_1719696 | PLD1     | -1.43397 | -1.57 - -1.31 | 4.23E-11 | 2.72E-10 |
| ILMN_1749662 | GPX1     | 1.30883  | 1.22 - 1.40   | 5.80E-11 | 3.66E-10 |
| ILMN_1791280 | HSPB8    | -1.34179 | -1.45 - -1.24 | 6.52E-11 | 4.03E-10 |

|              |           |          |               |          |          |
|--------------|-----------|----------|---------------|----------|----------|
| ILMN_1712803 | CCNB1     | 1.42364  | 1.30 - 1.56   | 8.20E-11 | 4.89E-10 |
| ILMN_1701134 | PTEN      | -1.20776 | -1.27 - -1.15 | 9.49E-11 | 5.56E-10 |
| ILMN_2222234 | PRDX4     | 1.36535  | 1.26 - 1.48   | 1.50E-10 | 8.66E-10 |
| ILMN_1734830 | MTHFR     | -1.20271 | -1.26 - -1.15 | 1.57E-10 | 8.90E-10 |
| ILMN_1663390 | CDC20     | 1.69913  | 1.48 - 1.95   | 1.86E-10 | 1.03E-09 |
| ILMN_1736176 | PLK1      | 1.24075  | 1.17 - 1.31   | 2.19E-10 | 1.18E-09 |
| ILMN_1667476 | LTBR      | 1.29694  | 1.21 - 1.39   | 3.43E-10 | 1.81E-09 |
| ILMN_1730416 | CYCS      | -1.45467 | -1.61 - -1.31 | 4.08E-10 | 2.13E-09 |
| ILMN_2395236 | CHEK2     | 1.20755  | 1.15 - 1.27   | 4.37E-10 | 2.24E-09 |
| ILMN_1795715 | DPYD      | -1.23998 | -1.31 - -1.17 | 4.84E-10 | 2.43E-09 |
| ILMN_1757350 | CTNNB1    | 1.50017  | 1.34 - 1.68   | 4.88E-10 | 2.43E-09 |
| ILMN_1742410 | BCL2L1    | 1.22753  | 1.16 - 1.30   | 1.11E-09 | 5.35E-09 |
| ILMN_2362974 | CASP7     | -1.32139 | -1.43 - -1.22 | 1.32E-09 | 6.26E-09 |
| ILMN_1779356 | TP53      | -1.21082 | -1.28 - -1.15 | 1.39E-09 | 6.53E-09 |
| ILMN_1684217 | AURKB     | 1.41434  | 1.28 - 1.56   | 1.80E-09 | 8.32E-09 |
| ILMN_1746396 | CTNNB1    | 1.46362  | 1.31 - 1.63   | 1.90E-09 | 8.66E-09 |
| ILMN_2311089 | BRCA1     | 1.38491  | 1.26 - 1.52   | 1.97E-09 | 8.83E-09 |
| ILMN_2331010 | TNFRSF10B | 1.22834  | 1.16 - 1.30   | 2.97E-09 | 1.32E-08 |
| ILMN_2321064 | BAX       | 1.25597  | 1.17 - 1.35   | 2.23E-08 | 9.39E-08 |
| ILMN_1789641 | ABCG2     | -1.26165 | -1.36 - -1.17 | 2.74E-08 | 1.14E-07 |
| ILMN_1717714 | CDKN2A    | 1.23182  | 1.15 - 1.32   | 2.90E-08 | 1.19E-07 |
| ILMN_1676984 | DDIT3     | 1.25948  | 1.17 - 1.36   | 3.29E-08 | 1.32E-07 |
| ILMN_1738027 | BRCA1     | 1.24487  | 1.16 - 1.34   | 5.06E-08 | 1.98E-07 |
| ILMN_1717056 | TXNRD1    | 1.21855  | 1.14 - 1.30   | 6.29E-08 | 2.43E-07 |
| ILMN_1707720 | SLC1A5    | 1.31458  | 1.20 - 1.44   | 1.00E-07 | 3.73E-07 |
| ILMN_1699265 | TNFRSF10B | 1.32058  | 1.20 - 1.45   | 1.19E-07 | 4.39E-07 |
| ILMN_1688698 | ZEB2      | -1.2335  | -1.32 - -1.15 | 1.33E-07 | 4.85E-07 |
| ILMN_1678669 | RRM2      | 1.27833  | 1.18 - 1.39   | 1.43E-07 | 5.16E-07 |

|              |         |          |               |          |          |
|--------------|---------|----------|---------------|----------|----------|
| ILMN_1784602 | CDKN1A  | -1.42697 | -1.61 - -1.26 | 1.92E-07 | 6.78E-07 |
| ILMN_1812070 | ABCB1   | -1.70959 | -2.06 - -1.42 | 2.00E-07 | 6.99E-07 |
| ILMN_2370825 | ATM     | -1.27237 | -1.39 - -1.17 | 4.37E-07 | 1.48E-06 |
| ILMN_1700606 | RNF43   | 1.66331  | 1.39 - 2.00   | 5.64E-07 | 1.89E-06 |
| ILMN_1787461 | RUNX3   | -1.37375 | -1.54 - -1.22 | 6.17E-07 | 2.01E-06 |
| ILMN_1734353 | GPX4    | 1.25833  | 1.16 - 1.37   | 6.19E-07 | 2.01E-06 |
| ILMN_1706386 | SLC39A4 | 1.26647  | 1.16 - 1.38   | 7.43E-07 | 2.37E-06 |
| ILMN_1779214 | ATM     | -1.24556 | -1.35 - -1.15 | 8.73E-07 | 2.75E-06 |
| ILMN_1693145 | BUB3    | 1.20414  | 1.12 - 1.29   | 9.42E-07 | 2.94E-06 |
| ILMN_2358457 | ATF4    | 1.23045  | 1.14 - 1.33   | 1.55E-06 | 4.74E-06 |
| ILMN_2378952 | GPX4    | 1.23771  | 1.14 - 1.34   | 1.73E-06 | 5.26E-06 |
| ILMN_1745806 | PEMT    | 1.2187   | 1.13 - 1.31   | 2.03E-06 | 6.12E-06 |
| ILMN_1661886 | APEX1   | 1.2093   | 1.12 - 1.30   | 2.82E-06 | 8.42E-06 |
| ILMN_2395240 | CHEK2   | 1.21346  | 1.12 - 1.31   | 3.96E-06 | 1.17E-05 |
| ILMN_2094875 | ABCB1   | -1.5083  | -1.78 - -1.28 | 4.14E-06 | 1.21E-05 |
| ILMN_2346339 | FOLR1   | 1.54334  | 1.29 - 1.85   | 1.20E-05 | 3.34E-05 |
| ILMN_1661733 | FOLR1   | 1.51489  | 1.25 - 1.83   | 4.54E-05 | 0.000121 |
| ILMN_1686871 | PARP1   | 1.21346  | 1.11 - 1.33   | 4.70E-05 | 0.000124 |
| ILMN_1806040 | TYMS    | 1.3108   | 1.15 - 1.49   | 8.75E-05 | 0.000224 |
| ILMN_1674236 | HSPB1   | 1.28369  | 1.13 - 1.46   | 0.000273 | 0.000644 |
| ILMN_1778561 | WEE1    | 1.20575  | 1.09 - 1.33   | 0.000389 | 0.000871 |
| ILMN_1724480 | AXIN2   | 1.50477  | 1.20 - 1.89   | 0.000637 | 0.001374 |
| ILMN_1720282 | NQO1    | 1.33776  | 1.12 - 1.60   | 0.002169 | 0.004391 |
| ILMN_1804735 | CBS     | 1.30833  | 1.10 - 1.55   | 0.002567 | 0.005103 |
