# Supplementary material for: Mutation and Microsatellite Instability (MSI) Affect the Differential Gene Expression of Folic Acid and 5-Flourouracil Metabolism-Related Genes in Colorectal Carcinoma
Source: MDPI journal article supplement (doi:10.3390/curroncol32120661), 2025-11-26
Supplement: s1 [file Supplementary Table S4-S11.pdf › Supplementary Table S4-S11.pdf]

# Supplementary Tables

**Table S4.** Pathways with significant differential expression in relation to age of onset.

| Gene Set                        | Interaction $p$       | Interaction FDR $p$   | Late-Onset (>40 Years) |                  | Early-Onset (<40 Years) |                  |
|---------------------------------|-----------------------|-----------------------|------------------------|------------------|-------------------------|------------------|
|                                 |                       |                       | Fold Change            | (95% CI)         | Fold Change             | (95% CI)         |
| Cell Cycle Checkpoint Genes     | $2.45 \times 10^{-4}$ | $1.72 \times 10^{-3}$ | 1.29                   | (1.27 to 1.32)   | 1.21                    | (1.19 to 1.24)   |
| Oxidative Stress Response Genes | $1.56 \times 10^{-2}$ | $5.68 \times 10^{-2}$ | 1.12                   | (1.1 to 1.15)    | 1.07                    | (1.04 to 1.10)   |
| Apoptotic gene                  | $2.83 \times 10^{-2}$ | $7.92 \times 10^{-2}$ | -1.02                  | (-1.03 to -1.01) | -1.04                   | (-1.05 to -1.02) |
| DNA Repair Mechanisms           | $4.52 \times 10^{-2}$ | $1.05 \times 10^{-1}$ | 1.05                   | (1.03 to 1.06)   | 1.04                    | (1.02 to 1.06)   |

**Table S5.** Pathways with significant differential expression in relation to grade.

| Gene Set                        | Interaction $p$        | Interaction FDR $p$    | High Grade  |                | Low Grade   |                |
|---------------------------------|------------------------|------------------------|-------------|----------------|-------------|----------------|
|                                 |                        |                        | Fold Change | (95% CI)       | Fold Change | (95% CI)       |
| Cell Cycle Checkpoint Genes     | $2.59 \times 10^{-16}$ | $3.62 \times 10^{-15}$ | 1.15        | (1.11 to 1.19) | 1.29        | (1.27 to 1.31) |
| Oxidative Stress Response Genes | $1.89 \times 10^{-3}$  | $3.31 \times 10^{-3}$  | 1.05        | (1.01 to 1.09) | 1.12        | (1.10 to 1.14) |

**Table S6.** Pathways with significant differential expression in relation to PN Invasion.

| Gene Set                           | Interaction<br>p      | Interaction<br>FDR p  | No PN Invasion |                  | PN Invasion<br>Present |                  |
|------------------------------------|-----------------------|-----------------------|----------------|------------------|------------------------|------------------|
|                                    |                       |                       | Fold<br>Change | (95% CI)         | Fold<br>Change         | (95% CI)         |
| Cell Cycle Checkpoint<br>Genes     | $8.36 \times 10^{-8}$ | $1.17 \times 10^{-6}$ | 1.28           | (1.26 to 1.30)   | 1.2                    | (1.16 to 1.24)   |
| Oxidative Stress<br>Response Genes | $1.25 \times 10^{-3}$ | $8.72 \times 10^{-3}$ | 1.12           | (1.10 to 1.14)   | 1.05                   | (1.01 to 1.09)   |
| Signaling pathway                  | $3.44 \times 10^{-3}$ | $1.61 \times 10^{-2}$ | 1.09           | (1.07 to 1.11)   | 1.05                   | (1.01 to 1.09)   |
| Apoptotic gene                     | $9.17 \times 10^{-3}$ | $3.21 \times 10^{-2}$ | -1.02          | (-1.03 to -1.01) | -1.04                  | (-1.07 to -1.02) |

**Table S7.** Pathways with significant differential expression in relation to sex.

| Gene Set                           | Interaction<br>p      | Interaction<br>FDR p  | Female         |                  | Male           |                  |
|------------------------------------|-----------------------|-----------------------|----------------|------------------|----------------|------------------|
|                                    |                       |                       | Fold<br>Change | (95% CI)         | Fold<br>Change | (95% CI)         |
| Oxidative Stress<br>Response Genes | $5.21 \times 10^{-5}$ | $7.29 \times 10^{-4}$ | 1.09           | (1.06 to 1.12)   | 1.11           | (1.09 to 1.14)   |
| Drug Transport                     | $3.03 \times 10^{-4}$ | $2.12 \times 10^{-3}$ | 1.1            | (1.06 to 1.13)   | 1.06           | (1.03 to 1.09)   |
| Apoptotic gene                     | $1.54 \times 10^{-3}$ | $5.38 \times 10^{-3}$ | -1.04          | (-1.06 to -1.03) | -1.03          | (-1.03 to -1.00) |
| Cell Cycle Checkpoint<br>Genes     | $3.90 \times 10^{-2}$ | $9.14 \times 10^{-2}$ | 1.29           | (1.26 to 1.32)   | 1.25           | (1.22 to 1.27)   |
| Heat Shock Response<br>Genes       | $3.92 \times 10^{-2}$ | $9.14 \times 10^{-2}$ | 1.35           | (1.28 to 1.43)   | 1.28           | (1.23 to 1.34)   |

**Table S8.** Pathways with significant differential expression in relation to signet ring presence.

| Gene Set                           | Interaction<br>p       | Interaction<br>FDR p   | Signet Absent  |                      | Signet Present |                |
|------------------------------------|------------------------|------------------------|----------------|----------------------|----------------|----------------|
|                                    |                        |                        | Fold<br>Change | (95%<br>CI)          | Fold<br>Change | (95% CI)       |
| Cell Cycle Checkpoint<br>Genes     | $1.68 \times 10^{-17}$ | $2.35 \times 10^{-16}$ | 1.29           | (1.27 to<br>1.31)    | 1.19           | (1.16 to 1.22) |
| EMT & tumor invasion               | $5.11 \times 10^{-7}$  | $3.57 \times 10^{-6}$  | -1.05          | (-1.10 to -<br>1.00) | 1.14           | (1.07 to 1.23) |
| Oxidative Stress<br>Response Genes | $2.52 \times 10^{-3}$  | $1.18 \times 10^{-2}$  | 1.12           | (1.10 to<br>1.14)    | 1.06           | (1.03 to 1.10) |

**Table S9.** Pathways with significant differential expression in relation to CRC stage.

| Gene Set                             | Interaction<br>p      | Interaction<br>FDR p  | Stage 1        |                | Stage 2        |                | Stage 3        |                |
|--------------------------------------|-----------------------|-----------------------|----------------|----------------|----------------|----------------|----------------|----------------|
|                                      |                       |                       | Fold<br>Change | (95% CI)       | Fold<br>Change | (95% CI)       | Fold<br>Change | (95% CI)       |
| Cell Cycle<br>Checkpoint<br>Genes    | $9.64 \times 10^{-6}$ | $1.35 \times 10^{-4}$ | 1.34           | (1.30 to 1.39) | 1.27           | (1.23 to 1.30) | 1.24           | (1.21 to 1.26) |
| Heat Shock<br>Response Genes         | $1.82 \times 10^{-4}$ | $1.27 \times 10^{-3}$ | 1.24           | (1.14 to 1.35) | 1.26           | (1.19 to 1.34) | 1.36           | (1.30 to 1.43) |
| Oxidative Stress<br>Response Genes   | $2.40 \times 10^{-3}$ | $1.11 \times 10^{-2}$ | 1.16           | (1.12 to 1.21) | 1.09           | (1.06 to 1.12) | 1.09           | (1.07 to 1.12) |
| Folate & One<br>carbon<br>metabolism | $1.26 \times 10^{-2}$ | $3.52 \times 10^{-2}$ | 1.08           | (1.05 to 1.12) | 1.04           | (1.01 to 1.06) | 1.03           | (1.01 to 1.05) |

**Table S10.** Pathways with significant differential expression in relation telomere status.

| Gene Set                       | Interaction<br>p      | Interaction<br>FDR p  | Pts with no TEL<br>Shortening |                | Pts with TEL<br>Shortening |                |
|--------------------------------|-----------------------|-----------------------|-------------------------------|----------------|----------------------------|----------------|
|                                |                       |                       | Fold<br>Change                | (95% CI)       | Fold<br>Change             | (95% CI)       |
| Cell Cycle Checkpoint<br>Genes | $4.14 \times 10^{-6}$ | $5.80 \times 10^{-5}$ | 1.20                          | (1.16 to 1.23) | 1.29                       | (1.27 to 1.31) |

**Table S11.** Pathways with significant differential expression in relation to TIL status.

| Gene Set                           | Interaction<br>p      | Interaction<br>FDR p  | TIL Binary 0   |                | TIL Binary 1   |                |
|------------------------------------|-----------------------|-----------------------|----------------|----------------|----------------|----------------|
|                                    |                       |                       | Fold<br>Change | (95% CI)       | Fold<br>Change | (95% CI)       |
| Oxidative Stress<br>Response Genes | $3.42 \times 10^{-3}$ | $3.73 \times 10^{-2}$ | 1.07           | (1.05 to 1.10) | 1.14           | (1.11 to 1.17) |
| Signaling pathway                  | $5.34 \times 10^{-3}$ | $3.73 \times 10^{-2}$ | 1.05           | (1.03 to 1.08) | 1.11           | (1.08 to 1.13) |
