# Supplementary material for: Mutation and Microsatellite Instability (MSI) Affect the Differential Gene Expression of Folic Acid and 5-Flourouracil Metabolism-Related Genes in Colorectal Carcinoma
Source: MDPI journal article supplement (doi:10.3390/curroncol32120661), 2025-11-26
Supplement: s1 [file Supplementary Table S12.pdf › Supplementary Table S12.pdf]

**Table S12.** Differential expression of 29 folic acid related genes in early vs. late onset CRC.

| Gene    | Interaction p-value | FDR (p-value) | (CRC * Young vs. Normal * Young) |                |          | (CRC * Old vs. Normal * Old) |                |          |
|---------|---------------------|---------------|----------------------------------|----------------|----------|------------------------------|----------------|----------|
|         |                     |               | Fold Change                      | (95% CI)       | p-value  | Fold-Change                  | (95% CI)       | p-value  |
| MSH2    | 0.000145            | 0.048135      | -1.00                            | (-1.06-1.06)   | 0.973312 | 1.10                         | (1.05-1.15)    | 0.000116 |
| PLD1    | 0.000908            | 0.150197      | -1.27                            | (-1.45- -1.11) | 0.00051  | -1.52                        | (-1.69- -1.38) | 9.17E-14 |
| PARP2   | 0.003083            | 0.340198      | 1.1                              | (1.02-1.19)    | 0.016242 | 1.23                         | (1.16-1.30)    | 2.14E-10 |
| DFFA    | 0.005436            | 0.354128      | 1.13                             | (1.05-1.21)    | 0.00059  | 1.26                         | (1.2-1.33)     | 2.80E-15 |
| XBP1    | 0.00933             | 0.354128      | 1.03                             | (-1.23-1.29)   | 0.826121 | -1.19                        | (-1.42- -1.00) | 0.048719 |
| ATF6    | 0.009611            | 0.354128      | 1.08                             | (-1.01-1.19)   | 0.098944 | 1.16                         | (1.07-1.25)    | 0.000141 |
| BIRC5   | 0.010815            | 0.354128      | 1.12                             | (1.03-1.20)    | 0.005989 | 1.29                         | (1.21-1.37)    | 1.19E-13 |
| APEX1   | 0.011255            | 0.354128      | 1.06                             | (-1.06-1.20)   | 0.331988 | 1.27                         | (1.15-1.39)    | 2.37E-06 |
| MAPK3   | 0.011561            | 0.354128      | -1.40                            | (-1.66- -1.17) | 0.000238 | -1.84                        | (-2.11- -1.61) | 1.26E-15 |
| HSPA5   | 0.011589            | 0.354128      | -1.06                            | (-1.22-1.08)   | 0.377135 | -1.05                        | (-1.17-1.05)   | 0.316404 |
| XBP1    | 0.012036            | 0.354128      | 1.01                             | (-1.26-1.28)   | 0.953177 | -1.19                        | (-1.43-1.00)   | 0.058312 |
| MAPK3   | 0.012839            | 0.354128      | -1.42                            | (-1.68- -1.20) | 6.77E-05 | -1.78                        | (-2.03- -1.57) | 2.96E-15 |
| CSNK1A1 | 0.018355            | 0.436603      | -1.02                            | (-1.10-1.04)   | 0.507254 | 1.11                         | (1.05-1.17)    | 0.000294 |
| FPGS    | 0.019686            | 0.436603      | 1.02                             | (-1.03-1.07)   | 0.465476 | 1.10                         | (1.05-1.15)    | 1.35E-05 |
| BIRC5   | 0.022032            | 0.436603      | 1.50                             | (1.25-1.79)    | 1.75E-05 | 1.84                         | (1.60-2.11)    | 6.15E-15 |
| ENO1    | 0.022478            | 0.436603      | 1.22                             | (1.07-1.38)    | 0.002575 | 1.52                         | (1.38-1.67)    | 2.22E-14 |
| CHGB    | 0.02305             | 0.436603      | -3.11                            | (-4.02- -2.40) | 6.85E-15 | -3.28                        | (-3.40- -2.70) | 4.53E-23 |
| MAPK1   | 0.025159            | 0.436603      | 1.02                             | (-1.07-1.12)   | 0.617834 | -1.00                        | (-1.08- -1.07) | 0.929933 |
| GGH     | 0.025746            | 0.436603      | -1.07                            | (-1.32-1.14)   | 0.495128 | 1.21                         | (1.03-1.42)    | 0.017899 |
| GPX4    | 0.027573            | 0.436603      | 1.17                             | (1.03-1.33)    | 0.017687 | 1.28                         | (1.16-1.41)    | 3.14E-06 |
| UPP1    | 0.027713            | 0.436603      | 1.00                             | (-1.05-1.05)   | 0.919818 | -1.00                        | (-1.04-1.04)   | 0.997523 |
| ERCC5   | 0.029019            | 0.436603      | 1.05                             | (-1.10-1.20)   | 0.523637 | -1.22                        | (-1.36- -1.09) | 0.00045  |
| APEX1   | 0.03137             | 0.451448      | 1.02                             | (-1.14-1.19)   | 0.759785 | 1.26                         | (1.12-1.41)    | 0.000142 |
| PARP2   | 0.03409             | 0.47016       | 1.12                             | (1.03-1.22)    | 0.005591 | 1.19                         | (1.12-1.26)    | 2.58E-07 |
| ABCC5   | 0.038767            | 0.513278      | 1.11                             | (-1.03-1.27)   | 0.115653 | -1.12                        | (-1.24- -1.01) | 0.034003 |
| TNFSF10 | 0.045585            | 0.561097      | -1.56                            | (-1.90- -1.28) | 9.92E-06 | -1.77                        | (-2.05- -1.53) | 2.47E-12 |
| GADD45A | 0.047019            | 0.561097      | -1.22                            | (-1.45- -1.02) | 0.023313 | -1.04                        | (-1.19-1.09)   | 0.530332 |
| CDK4    | 0.047882            | 0.561097      | 1.57                             | (1.38-1.78)    | 6.58E-11 | 1.88                         | (1.71-2.07)    | 1.14E-25 |
| HSPA1A  | 0.049429            | 0.561097      | 1.52                             | (1.11-2.27)    | 0.008464 | 1.01                         | (-1.25-1.28)   | 0.939835 |
